# Supplementary material for: Instrumented Balance Error Scoring System in Children and Adolescents—A Cross Sectional Study
Source: MDPI journal article supplement (doi:10.3390/diagnostics14050513), 2024-02-28
Supplement: s1 [file s1]

**Table S1**

Repeated measures ANOVA for the six test positions for the instrumented BESS

| Parameter        | Sum of Squares | df   | Mean Square    | F      | <i>p</i> |
|------------------|----------------|------|----------------|--------|----------|
| BESS Score       | 1,913.87       | 2.82 | 677.71         | 116.56 | < .001   |
| Ellipse Area     | 1,221,355.39   | 2.44 | 500,830.33     | 22.20  | < .001   |
| Path Length      | 370,641,832.00 | 2.35 | 157,528,600.00 | 59.07  | < .001   |
| Mean Velocity    | 9,276.52       | 2.35 | 3,944.11       | 59.18  | < .001   |
| Mean Velocity ML | 312,949.97     | 1.96 | 159,521.85     | 25.22  | < .001   |
| Mean Velocity AP | 389,125.56     | 2.34 | 166,595.37     | 23.04  | < .001   |

Mean velocity in medio-lateral (Mean Velocity ML), mean velocity in anterior-posterior (Mean Velocity AP)

**Table S2**

Post-hoc pairwise comparison for BESS error scores in all 6 testing positions

| Testing position |        | Mean Difference | Std. Error (SE) | <i>p</i> | 95% confidence interval (CI) |       |
|------------------|--------|-----------------|-----------------|----------|------------------------------|-------|
|                  |        |                 |                 |          | Lower                        | Upper |
| 2L FS            | 1L FS  | -4.81           | 0.47            | .001     | -6.27                        | -3.35 |
|                  | Tan FS | -1.54           | 0.27            | .001     | -2.39                        | -0.69 |
|                  | 2L SS  | -0.84           | 0.17            | .001     | -1.36                        | -0.31 |
|                  | 1L SS  | -8.38           | 0.29            | .001     | -9.29                        | -7.47 |
|                  | Tan SS | -5.24           | 0.47            | .001     | -6.72                        | -3.76 |
| 1L FS            | Tan FS | 3.27            | 0.42            | .001     | 1.95                         | 4.59  |
|                  | 2L SS  | 3.97            | 0.46            | .001     | 2.53                         | 5.42  |
|                  | 1L SS  | -3.57           | 0.40            | .001     | -4.81                        | -2.32 |
|                  | Tan SS | -0.43           | 0.66            | .999     | -2.51                        | 1.64  |
| Tan FS           | 2L SS  | 0.70            | 0.29            | .322     | -0.22                        | 1.62  |
|                  | 1L SS  | -6.84           | 0.34            | .001     | -7.92                        | -5.76 |
|                  | Tan SS | -3.70           | 0.50            | .001     | -5.26                        | -2.14 |
| 2L SS            | 1L SS  | -7.54           | 0.33            | .001     | -8.57                        | -6.51 |
|                  | Tan SS | -4.41           | 0.44            | .001     | -5.80                        | -3.01 |
| 1L SS            | Tan SS | 3.14            | 0.55            | .001     | 1.39                         | 4.88  |

two-legged stance on firm surface (2L FS), one-legged stance on firm surface (1L FS), tandem stance on firm surface (Tan FS), two-legged stance on soft surface (2L SS), one-legged stance on soft surface (1L SS), tandem stance on soft surface (Tan SS)

**Table S3**

Post-hoc pairwise comparison for EA in all 6 testing positions

| Testing position |        | Mean Difference | Std. Error (SE) | <i>p</i> | 95% confidence interval (CI) |         |
|------------------|--------|-----------------|-----------------|----------|------------------------------|---------|
|                  |        |                 |                 |          | Lower                        | Upper   |
| 2L FS            | 1L FS  | -109.48         | 28.10           | .006     | -197.81                      | -21.15  |
|                  | Tan FS | -19.08          | 5.01            | .008     | -34.82                       | -3.35   |
|                  | 2L SS  | -19.41          | 1.87            | .001     | -25.29                       | -13.54  |
|                  | 1L SS  | -213.16         | 27.75           | .001     | -300.41                      | -125.90 |
|                  | Tan SS | -105.63         | 16.38           | .001     | -157.14                      | -54.13  |
| 1L FS            | Tan FS | 90.40           | 27.38           | .033     | 4.33                         | 176.47  |
|                  | 2L SS  | 90.07           | 28.48           | .048     | 0.54                         | 179.59  |
|                  | 1L SS  | -103.68         | 32.59           | .045     | -206.14                      | -1.22   |
|                  | Tan SS | 3.85            | 36.09           | .999     | -109.63                      | 117.32  |
| Tan FS           | 2L SS  | -0.33           | 5.48            | .999     | -17.55                       | 16.88   |
|                  | 1L SS  | -194.08         | 28.09           | .001     | -282.39                      | -105.76 |
|                  | Tan SS | -86.55          | 18.16           | .001     | -143.63                      | -29.47  |
| 2L SS            | 1L SS  | -193.74         | 27.59           | .001     | -280.49                      | -107.10 |
|                  | Tan SS | -86.22          | 15.90           | .001     | -136.22                      | -36.22  |
| 1L SS            | Tan SS | 107.53          | 31.27           | .022     | 9.22                         | 205.83  |

two-legged stance on firm surface (2L FS), one-legged stance on firm surface (1L FS), tandem stance on firm surface (Tan FS), two-legged stance on soft surface (2L SS), one-legged stance on soft surface (1L SS), tandem stance on soft surface (Tan SS)

**Table S4**

Post-hoc pairwise comparison for PL in all 6 testing positions

| Testing position |        | Mean Difference | Std. Error (SE) | <i>p</i> | 95% confidence interval (CI) |           |
|------------------|--------|-----------------|-----------------|----------|------------------------------|-----------|
|                  |        |                 |                 |          | Lower                        | Upper     |
| 2L FS            | 1L FS  | -2,438.14       | 257.50          | .001     | -3,247.66                    | -1,628.61 |
|                  | Tan FS | -1,055.37       | 120.97          | .001     | -1,435.67                    | -675.07   |
|                  | 2L SS  | -920.18         | 64.01           | .001     | -1,121.42                    | -718.94   |
|                  | 1L SS  | -3,852.80       | 306.70          | .001     | -4,817.03                    | -2,888.58 |
|                  | Tan SS | -2,712.64       | 217.41          | .001     | -3,396.16                    | -2,029.12 |
| 1L FS            | Tan FS | 1,382.77        | 252.10          | .001     | 590.21                       | 2,175.33  |
|                  | 2L SS  | 1,517.95        | 270.00          | .001     | 669.11                       | 2,366.80  |
|                  | 1L SS  | -1,414.67       | 243.85          | .001     | -2,181.29                    | -648.04   |
|                  | Tan SS | -274.51         | 383.70          | .999     | -1,480.81                    | 931.80    |
| Tan FS           | 2L SS  | 135.18          | 129.89          | .999     | -273.18                      | 543.55    |
|                  | 1L SS  | -2,797.44       | 310.47          | .001     | -3,773.50                    | -1,821.38 |
|                  | Tan SS | -1,657.28       | 261.99          | .001     | -2,480.95                    | -833.61   |
| 2L SS            | 1L SS  | -2,932.62       | 301.99          | .001     | -3,882.04                    | -1,983.20 |
|                  | Tan SS | -1,792.46       | 195.58          | .001     | -2,407.34                    | -1,177.59 |
| 1L SS            | Tan SS | 1,140.16        | 369.78          | .059     | -22.37                       | 2,302.69  |

two-legged stance on firm surface (2L FS), one-legged stance on firm surface (1L FS), tandem stance on firm surface (Tan FS), two-legged stance on soft surface (2L SS), one-legged stance on soft surface (1L SS), tandem stance on soft surface (Tan SS)

**Table S5**

Post-hoc pairwise comparison for VM in all 6 testing positions

| Testing position |        | Mean Difference | Std. Error (SE) | <i>p</i> | 95% confidence interval (CI) |        |
|------------------|--------|-----------------|-----------------|----------|------------------------------|--------|
|                  |        |                 |                 |          | Lower                        | Upper  |
| 2L FS            | 1L FS  | -12.21          | 1.29            | .001     | -16.25                       | -8.17  |
|                  | Tan FS | -5.29           | 0.60            | .001     | -7.19                        | -3.40  |
|                  | 2L SS  | -4.62           | 0.32            | .001     | -5.62                        | -3.62  |
|                  | 1L SS  | -19.28          | 1.53            | .001     | -24.09                       | -14.47 |
|                  | Tan SS | -13.58          | 1.09            | .001     | -17.00                       | -10.16 |
| 1L FS            | Tan FS | 6.91            | 1.26            | .001     | 2.95                         | 10.88  |
|                  | 2L SS  | 7.59            | 1.35            | .001     | 3.35                         | 11.83  |
|                  | 1L SS  | -7.07           | 1.22            | .001     | -10.91                       | -3.24  |
|                  | Tan SS | -1.37           | 1.92            | .999     | -7.40                        | 4.66   |
| Tan FS           | 2L SS  | 0.68            | 0.65            | .999     | -1.37                        | 2.72   |
|                  | 1L SS  | -13.99          | 1.55            | .001     | -18.87                       | -9.11  |
|                  | Tan SS | -8.29           | 1.31            | .001     | -12.40                       | -4.17  |
| 2L SS            | 1L SS  | -14.66          | 1.51            | .001     | -19.41                       | -9.92  |
|                  | Tan SS | -8.96           | 0.98            | .001     | -12.05                       | -5.89  |
| 1L SS            | Tan SS | 5.70            | 1.85            | .059     | 0.11                         | 11.51  |

two-legged stance on firm surface (2L FS), one-legged stance on firm surface (1L FS), tandem stance on firm surface (Tan FS), two-legged stance on soft surface (2L SS), one-legged stance on soft surface (1L SS), tandem stance on soft surface (Tan SS)

**Table S6**

Post-hoc pairwise comparison for VMml in all 6 testing positions

| Testing position |        | Mean Difference | Std. Error (SE) | <i>p</i> | 95% confidence interval (CI) |        |
|------------------|--------|-----------------|-----------------|----------|------------------------------|--------|
|                  |        |                 |                 |          | Lower                        | Upper  |
| 2L FS            | 1L FS  | -64.94          | 7.24            | .001     | -87.70                       | -42.18 |
|                  | Tan FS | -26.44          | 2.73            | .001     | -35.01                       | -17.87 |
|                  | 2L SS  | -45.75          | 15.38           | .078     | -94.12                       | 2.61   |
|                  | 1L SS  | -120.24         | 9.13            | .001     | -148.96                      | -91.53 |
|                  | Tan SS | -68.40          | 5.59            | .001     | -85.96                       | -50.84 |
| 1L FS            | Tan FS | 38.50           | 6.61            | .001     | 17.71                        | 59.29  |
|                  | 2L SS  | 19.18           | 18.06           | .999     | -37.59                       | 75.96  |
|                  | 1L SS  | -55.31          | 8.30            | .001     | -81.39                       | -29.22 |
|                  | Tan SS | -3.46           | 10.04           | .999     | -35.03                       | 28.11  |
| Tan FS           | 2L SS  | -19.31          | 16.15           | .999     | -70.09                       | 31.46  |
|                  | 1L SS  | -93.80          | 8.78            | .001     | -121.41                      | -66.20 |
|                  | Tan SS | -41.96          | 6.27            | .001     | -61.69                       | -22.24 |
| 2L SS            | 1L SS  | -74.49          | 19.21           | .006     | -134.88                      | -14.10 |
|                  | Tan SS | -22.65          | 14.55           | .999     | -68.39                       | 23.09  |
| 1L SS            | Tan SS | 51.84           | 10.17           | .001     | 19.88                        | 83.81  |

two-legged stance on firm surface (2L FS), one-legged stance on firm surface (1L FS), tandem stance on firm surface (Tan FS), two-legged stance on soft surface (2L SS), one-legged stance on soft surface (1L SS), tandem stance on soft surface (Tan SS)

**Table S7**

Post-hoc pairwise comparison for VMap in all 6 testing positions

| Testing position |        | Mean Difference | Std. Error (SE) | <i>p</i> | 95% confidence interval (CI) |        |
|------------------|--------|-----------------|-----------------|----------|------------------------------|--------|
|                  |        |                 |                 |          | Lower                        | Upper  |
| 2L FS            | 1L FS  | -88.04          | 9.88            | .001     | -119.11                      | -56.97 |
|                  | Tan FS | -40.40          | 4.97            | .001     | -56.02                       | -24.79 |
|                  | 2L SS  | -44.30          | 15.56           | .109     | -93.24                       | 4.63   |
|                  | 1L SS  | -122.61         | 11.05           | .001     | -157.35                      | -87.88 |
|                  | Tan SS | -102.67         | 8.82            | .001     | -130.41                      | -74.94 |
| 1L FS            | Tan FS | 47.64           | 10.09           | .001     | 15.91                        | 79.37  |
|                  | 2L SS  | 43.74           | 19.78           | .502     | -18.45                       | 105.92 |
|                  | 1L SS  | -34.57          | 8.41            | .003     | -61.00                       | -8.15  |
|                  | Tan SS | -14.64          | 15.15           | .999     | -62.28                       | 33.01  |
| Tan FS           | 2L SS  | -3.90           | 17.03           | .999     | -57.43                       | 49.63  |
|                  | 1L SS  | -82.21          | 11.67           | .001     | -118.90                      | -45.52 |
|                  | Tan SS | -62.27          | 10.62           | .001     | -95.66                       | -28.89 |
| 2L SS            | 1L SS  | -78.31          | 20.82           | .009     | -143.75                      | -12.87 |
|                  | Tan SS | -58.37          | 14.34           | .004     | -103.44                      | -13.30 |
| 1L SS            | Tan SS | 19.94           | 14.28           | .999     | -24.96                       | 64.83  |

two-legged stance on firm surface (2L FS), one-legged stance on firm surface (1L FS), tandem stance on firm surface (Tan FS), two-legged stance on soft surface (2L SS), one-legged stance on soft surface (1L SS), tandem stance on soft surface (Tan SS)

**Table S8**

Comparison between VMml and VMap via paired t-test

| Testing position | Mean difference | Std. Error (SE) | 95% confidence interval (CI) |        | <i>p</i> |
|------------------|-----------------|-----------------|------------------------------|--------|----------|
|                  |                 |                 | Lower                        | Upper  |          |
| 2L FS            | 2.49            | 0.61            | 1.266                        | 3.72   | .001     |
| 1L FS            | -20.71          | 5.97            | -32.72                       | -8.50  | .001     |
| Tan FS           | -11.47          | 2.97            | -17.49                       | -5.45  | .001     |
| 2L SS            | 3.94            | 1.41            | 1.10                         | 6.78   | .008     |
| 1L SS            | 0.12            | 4.92            | -9.87                        | 10.11  | .980     |
| Tan SS           | -31.78          | 5.57            | -43.07                       | -20.49 | .001     |

two-legged stance on firm surface (2L FS), one-legged stance on firm surface (1L FS), tandem stance on firm surface (Tan FS), two-legged stance on soft surface (2L SS), one-legged stance on soft surface (1L SS), tandem stance on soft surface (Tan SS)
